# Supplementary material for: Ten months of temporal variation in the clinical journey of hospitalised patients with COVID-19: An observational cohort
Source: eLife journal article supplement (doi:10.7554/elife.70970), 2021-11-19

Case fatality rate

0.3  
0.2  
0.1  
0.0

March 1  
March 8  
March 15  
March 22  
March 29  
April 5  
April 12  
April 19  
April 26  
May 3  
May 10  
May 17  
May 24  
May 31  
June 7  
June 14  
June 21  
June 28  
July 5  
July 12  
July 19  
July 26  
August 2  
August 9  
August 16  
August 23  
August 30  
September 6  
September 13  
September 20  
September 27  
October 4  
October 11  
October 18  
October 25  
November 1  
November 8  
November 15  
November 22  
November 29  
December 6  
December 13  
December 20  
December 27

Week of COVID-19 admission (start date)

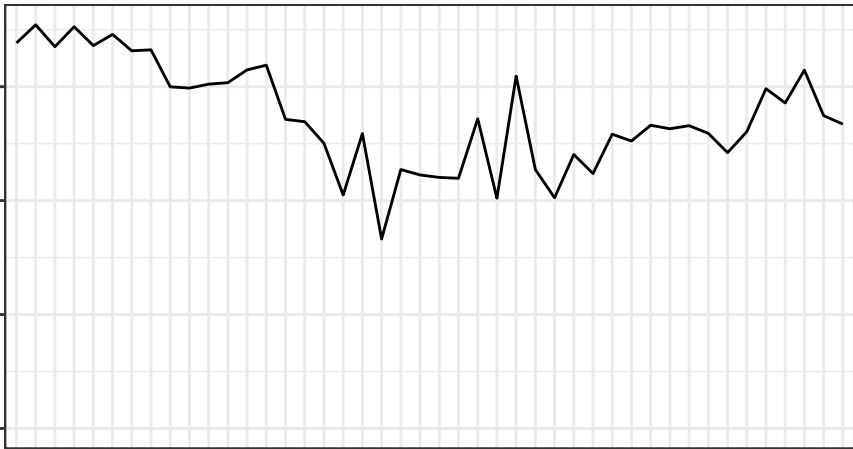

Supplement: supp [file elife_poa_e70970_Figure_3_figure_supplement_1.pdf › elife_poa_e70970_Figure_3_figure_supplement_1.pdf]
