# Supplementary figures and images for: Ten months of temporal variation in the clinical journey of hospitalised patients with COVID-19: An observational cohort
Source: eLife journal article supplement (doi:10.7554/elife.70970), 2021-11-19

Mean time from COVID-19 admission to outcome (days)

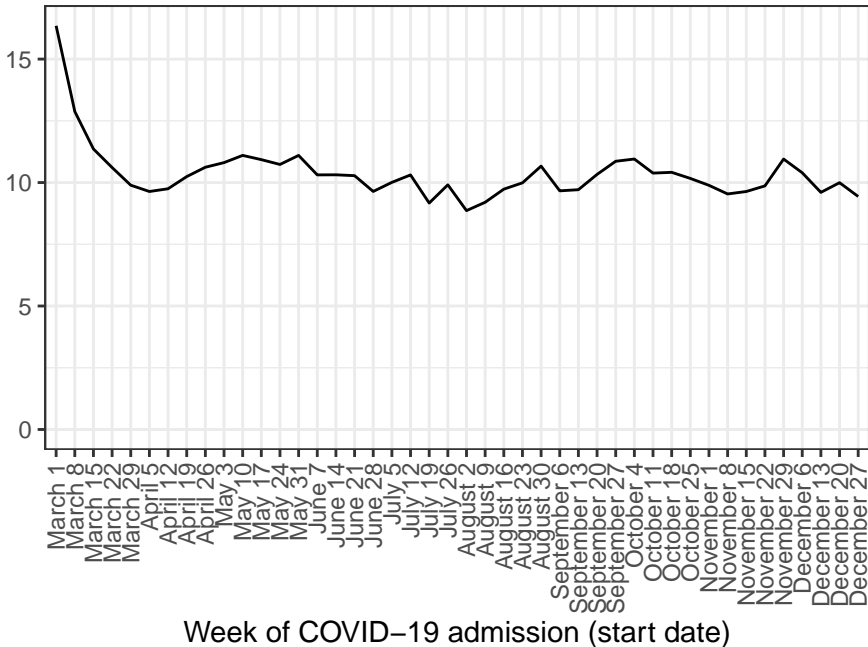

Supplement: supp [file elife_poa_e70970_Figure_3_figure_supplement_2.pdf › elife_poa_e70970_Figure_3_figure_supplement_2.pdf]

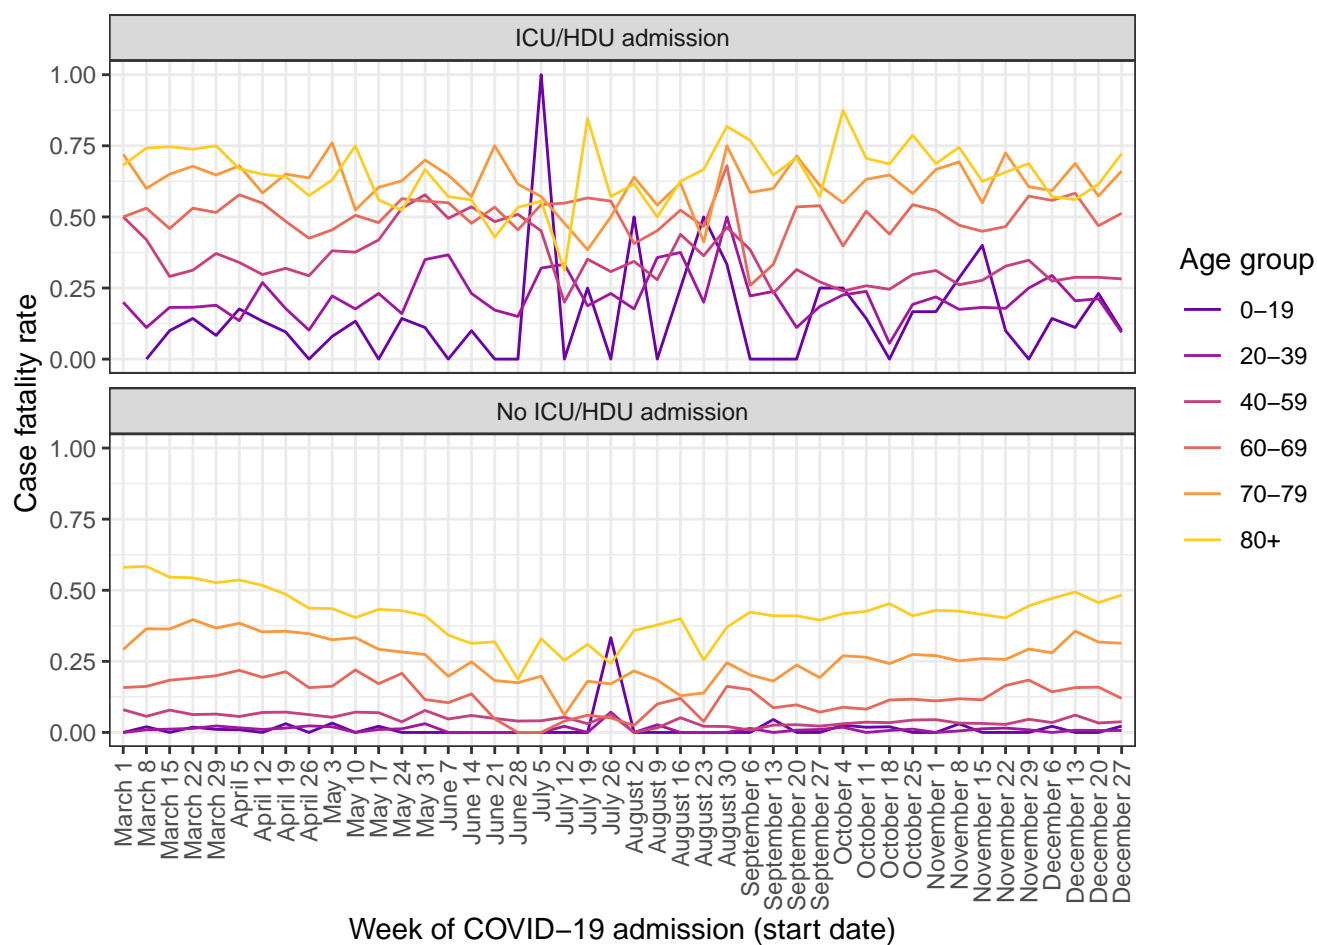

Supplement: supp [file elife_poa_e70970_Figure_3_figure_supplement_3.pdf › elife_poa_e70970_Figure_3_figure_supplement_3.pdf]

Age group

- 0-19
- 20-39
- 40-59
- 60-69
- 70-79
- 80+

Mean time from COVID-19 admission to outcome (days)

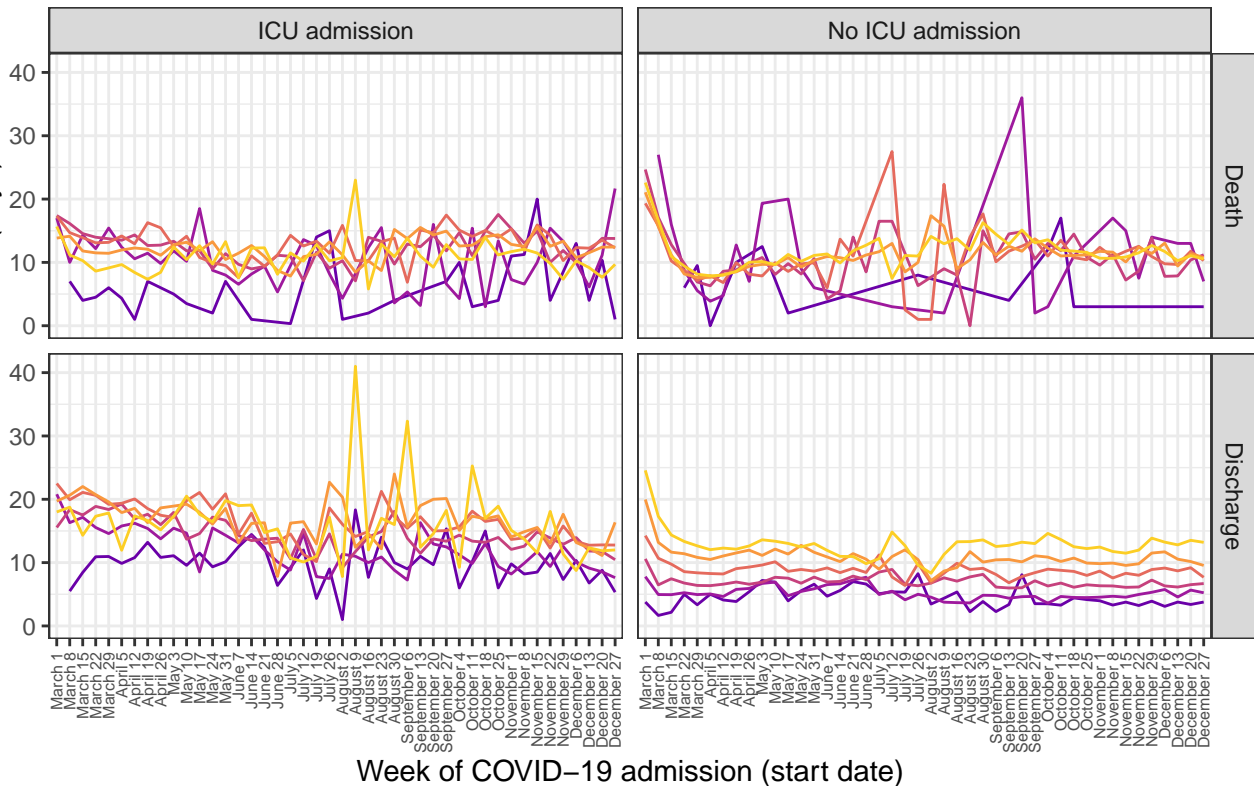

Supplement: supp [file elife_poa_e70970_Figure_3_figure_supplement_4.pdf › elife_poa_e70970_Figure_3_figure_supplement_4.pdf]

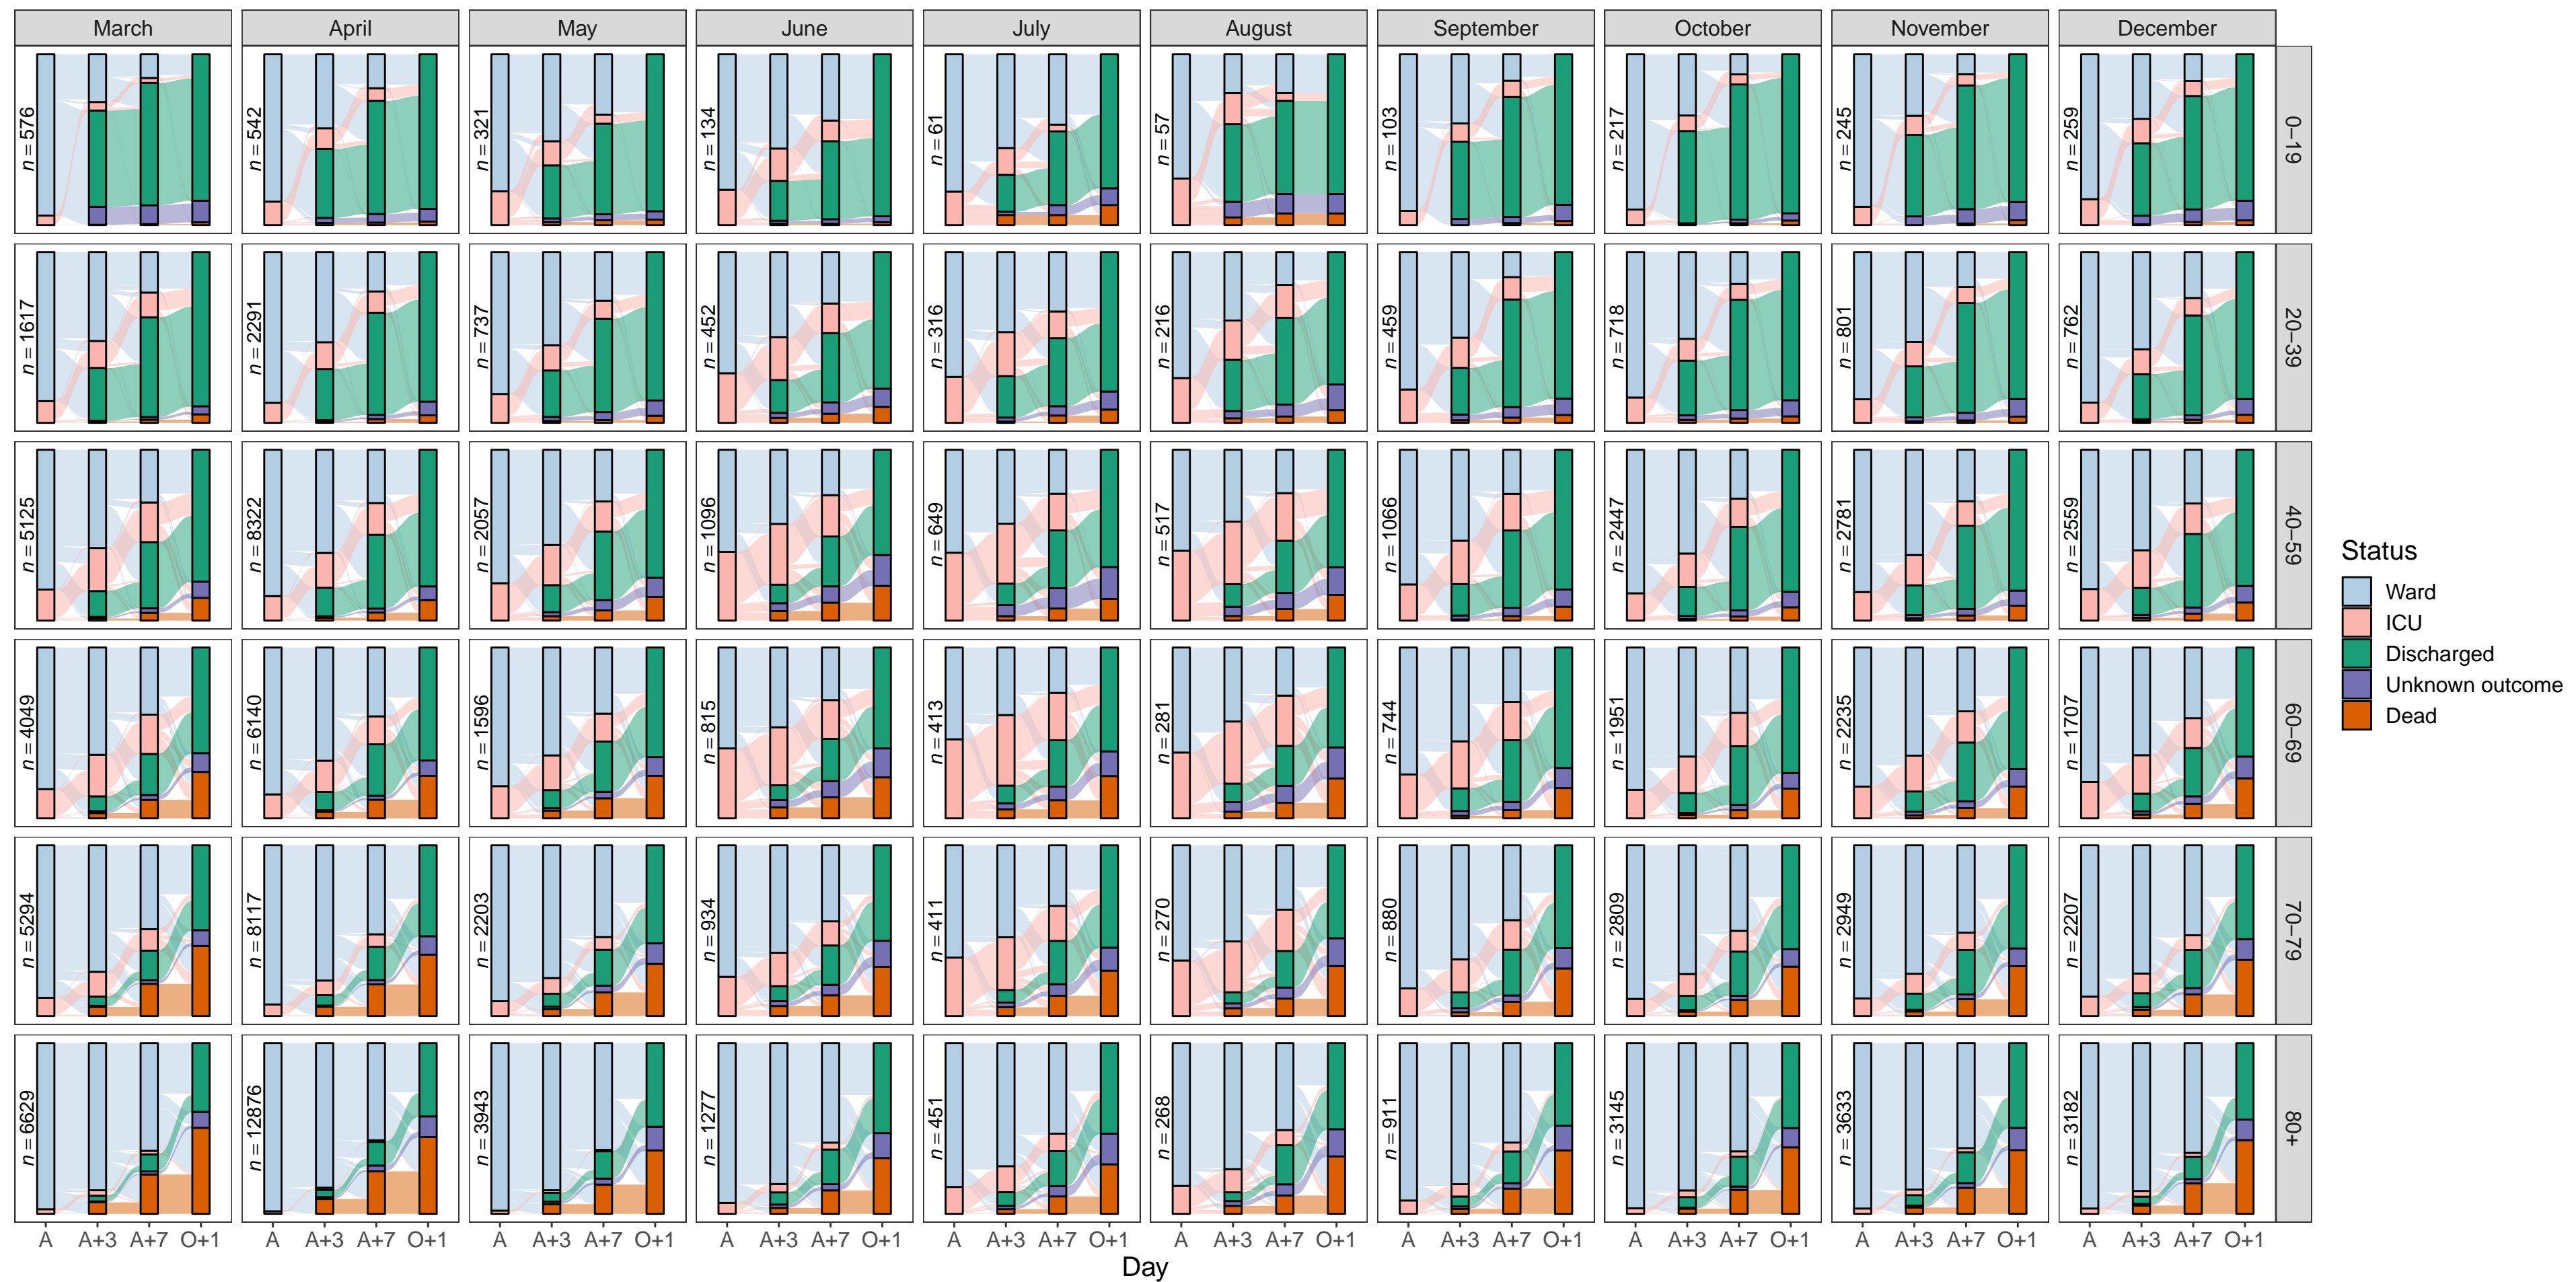

Supplement: supp [file elife_poa_e70970_Figure_5_figure_supplement_1.pdf › elife_poa_e70970_Figure_5_figure_supplement_1.pdf]
